# Supplementary material
Source: MDPI journal article supplement (https://www.mdpi.com/1424-2818/13/5/217)
Supplement: s1 [file s1]

Archive with 4 entries (4 files):
- Figure S1.pptx
- Table S1.xlsx
- Figure S1 (vector format).eps
- Figure S1 (vector format).pdf
